# Supplementary material for: Amine decorated polystyrene nanobeads incorporating π-conjugated OPV chromophore for picric acid sensing in water
Source: Royal Society of Chemistry journal article supplement (doi:10.1039/c9ra09852f), 2020-01-01
Supplement: c9ra09852f1.pdf [file c9ra09852f1.pdf]

# Supporting Information

for

**Amine Decorated Polystyrene Nanobeads Incorporating  $\pi$ -Conjugated OPV  
Chromophore for Picric acid Sensing in Water**

**Sarabjot Kaur Makkad<sup>a, b</sup>**

- a) Govt. Autonomous NPG College of Science, Raipur, India.
- b) CSIR-National Chemical Laboratory, Pune, India.

## Table of Content

| <u>Section</u>    | <u>Subject</u>                                                                                                                            | <u>Page No</u> |
|-------------------|-------------------------------------------------------------------------------------------------------------------------------------------|----------------|
| <b>Table S1</b>   | Number and weight average molar mass, polydispersity indices (PDI), solid content, zeta potential of PS-OPV-NH <sub>2</sub> .             | S4             |
| <b>Table S2</b>   | Dye loading content (DLC), Dye loading efficiency (DLE), polydispersity index ( $\bar{M}$ ).                                              | S4             |
| <b>Table S3</b>   | Average quenching percentage of OPV emission and quenching $\pm$ error (%) after the addition of the respective nitro compounds in water. | S4             |
| <b>Table S4</b>   | Average quenching percentage of OPV emission and quenching $\pm$ error (%) after the addition of the anions in water.                     | S5             |
| <b>Table S5</b>   | Average quenching percentage of OPV emission and quenching $\pm$ error (%) after the addition of the cations in water.                    | S6             |
| <b>Table S6</b>   | Comparison table for fluorescent sensors of PA in the literature.                                                                         | S7             |
| <b>Scheme S1</b>  | Chemical structures of nitro-organic compounds.                                                                                           | S8             |
| <b>Figure S1</b>  | FTIR plot of polymer on KBr pellet.                                                                                                       | S8             |
| <b>Figure S2</b>  | Normalized intensity-average size distribution of polymer in demineralized water using Dynamic Light Scattering.                          | S8             |
| <b>Figure S3</b>  | TEM image of PS-OPV-NH <sub>2</sub> polymer.                                                                                              | S9             |
| <b>Figure S4</b>  | Absorption spectra of the polymer in THF (1mg/ml) for DLC and DLE calculation.                                                            | S9             |
| <b>Figure S5</b>  | Solution state (a) emission and (b) excitation spectra of the polymer PS-OPV-NH <sub>2</sub> in demineralized water.                      | S9             |
| <b>Figure S6</b>  | CIE co-ordinate diagram of PS-OPV-NH <sub>2</sub> .                                                                                       | S10            |
| <b>Figure S7</b>  | Emission spectra for PS-OPV-NH <sub>2</sub> depicting non-quenching of OPV emission on varying pH from 1 to 14.                           | S10            |
| <b>Figure S8</b>  | Emission spectra for PS-OPV-NH <sub>2</sub> depicting non-quenching of OPV emission on varying temperature from 0°C to 60°C.              | S10            |
| <b>Figure S9.</b> | Plot of linear ranges using Stern-Volmer equation from 0 to 30 ( $R^2 = 0.982$ ) and 40 to 70 $\mu$ M ( $R^2 = 0.998$ ).                  | S11            |
| <b>Figure S10</b> | Plot of absorption spectra of PS-OPV-NH <sub>2</sub> on varying concentration of PA.                                                      | S11            |

|                   |                                                                                                             |     |
|-------------------|-------------------------------------------------------------------------------------------------------------|-----|
| <b>Figure S11</b> | Mechanism of quenching depicting the overlap of absorption spectra of nitrophenols to that of OPV emission. | S11 |
| <b>Figure S12</b> | Emission spectra of PS-OPV-NH <sub>2</sub> after the addition of 1M NaCl.                                   | S12 |
| <b>Figure S13</b> | Quenching observed on dipping free standing film into PA in water.                                          | S12 |
|                   | References                                                                                                  | S12 |

**Table S1.** Number and weight average molar mass, polydispersity indices (PDI), solid content, zeta potential of PS-OPV-NH<sub>2</sub>.

| <b>Sample</b>          | <b>Mn<sup>a</sup></b> | <b>Mw<sup>a</sup></b> | <b>PDI<sup>a</sup></b><br><b>(Đ)</b> | <b>Solid</b><br><b>content</b><br><b>(%)</b> | <b>Zeta</b><br><b>Potential<sup>b</sup></b> |
|------------------------|-----------------------|-----------------------|--------------------------------------|----------------------------------------------|---------------------------------------------|
| PS-OPV-NH <sub>2</sub> | 56700                 | 151000                | 2.6                                  | 21                                           | +36.6                                       |

- a) Measured by Gel Permeation Chromatography (GPC) in Chloroform (CHCl<sub>3</sub>) calibrated with linear, narrow molecular weight distribution polystyrene standards.
- b) Measured by Dynamic Light Scattering in water.

**Table S2.** Dye loading content (DLC), Dye loading efficiency (DLE), polydispersity index (Đ).

| <b>Sample</b>          | <b>Amount</b><br><b>of OPV</b><br><b>in feed</b><br><b>(mg)</b> | <b>Amount of</b><br><b>OPV</b><br><b>incorporated</b><br><b>(mg)<sup>a</sup></b> | <b>DLC</b><br><b>(%)<sup>a</sup></b><br><b>For</b><br><b>OPV</b> | <b>DLE</b><br><b>(%)<sup>a</sup></b><br><b>For</b><br><b>OPV</b> | <b>Size</b><br><b>(nm)<sup>b</sup></b> | <b>PDI<sup>b</sup></b> |
|------------------------|-----------------------------------------------------------------|----------------------------------------------------------------------------------|------------------------------------------------------------------|------------------------------------------------------------------|----------------------------------------|------------------------|
| PS-OPV-NH <sub>2</sub> | 30                                                              | 16.1                                                                             | 1.6                                                              | 53.6                                                             | 182                                    | 0.08                   |

- a) Dye Loading content (DLC) and Dye Loading Efficiency (DLE) are calculated by absorption studies in THF.
- b) Measured by Dynamic Light Scattering in water.

**Table S3.** Average quenching percentage of OPV emission and quenching ± error (%) after the addition of the respective nitro compounds in water.

| <b>Nitro</b><br><b>compounds</b> | <b>Average Quenching</b><br><b>(%)</b> | <b>Quenching ±</b><br><b>Error (%)</b> |
|----------------------------------|----------------------------------------|----------------------------------------|
| Ph                               | <b>6.8</b>                             | <b>0.4</b>                             |
| 1,2-DCB                          | <b>7.1</b>                             | <b>0.5</b>                             |
| 4-NBA                            | <b>7.4</b>                             | <b>0.5</b>                             |
| BA                               | <b>7.7</b>                             | <b>0.7</b>                             |

|         |             |            |
|---------|-------------|------------|
| 1,5-DNN | <b>8.6</b>  | <b>1.2</b> |
| 2,4-DNT | <b>9.6</b>  | <b>0.5</b> |
| 4-HBA   | <b>8.1</b>  | <b>1.5</b> |
| 4-NT    | <b>9.6</b>  | <b>1.8</b> |
| NM      | <b>9.5</b>  | <b>2.5</b> |
| 1,4-DNB | <b>20.4</b> | <b>1.2</b> |
| 2-NP    | <b>34.3</b> | <b>1.1</b> |
| 2,4-DNP | <b>71.3</b> | <b>1.9</b> |
| PA      | <b>91.5</b> | <b>1.5</b> |

**Table S4.** Average quenching percentage of OPV emission and quenching  $\pm$  error (%) after the addition of the anions in water.

| Nitro compounds               | Average Quenching (%) | Quenching $\pm$ Error (%) |
|-------------------------------|-----------------------|---------------------------|
| NO <sub>2</sub> <sup>-</sup>  | <b>2.3</b>            | <b>0.3</b>                |
| SO <sub>4</sub> <sup>2-</sup> | <b>2.7</b>            | <b>0.6</b>                |
| Cl <sup>-</sup>               | <b>3.4</b>            | <b>0.8</b>                |
| Br <sup>-</sup>               | <b>3.7</b>            | <b>1.3</b>                |
| NO <sub>3</sub> <sup>-</sup>  | <b>4.1</b>            | <b>1.9</b>                |
| AcO <sup>-</sup>              | <b>4.2</b>            | <b>1.4</b>                |
| SO <sub>3</sub> <sup>2-</sup> | <b>5.1</b>            | <b>0.8</b>                |
| HPO <sub>4</sub> <sup>-</sup> | <b>5.7</b>            | <b>1.3</b>                |
| F <sup>-</sup>                | <b>5.9</b>            | <b>0.8</b>                |
| I <sup>-</sup>                | <b>8.1</b>            | <b>0.4</b>                |
| PA                            | <b>91.5</b>           | <b>1.5</b>                |

**Table S5.** Average quenching percentage of OPV emission and quenching  $\pm$  error (%) after the addition of the cations in water.

| Nitro compounds | Average Quenching (%) | Quenching $\pm$ Error (%) |
|-----------------|-----------------------|---------------------------|
| Hg(II)          | <b>2.3</b>            | <b>0.3</b>                |
| Cu(II)          | <b>2.4</b>            | <b>0.3</b>                |
| Fe(II)          | <b>2.7</b>            | <b>0.6</b>                |
| Pb(I)           | <b>2.7</b>            | <b>0.5</b>                |
| K(I)            | <b>3.1</b>            | <b>0.9</b>                |
| Ni(II)          | <b>3.2</b>            | <b>1.6</b>                |
| Cr(III)         | <b>3.3</b>            | <b>1.2</b>                |
| Ca(II)          | <b>3.3</b>            | <b>1.1</b>                |
| Na(I)           | <b>3.4</b>            | <b>0.8</b>                |
| Co(II)          | <b>3.5</b>            | <b>2.1</b>                |
| Mn(II)          | <b>3.9</b>            | <b>1.7</b>                |
| Zn(II)          | <b>4.0</b>            | <b>0.5</b>                |
| Cd(II)          | <b>4.8</b>            | <b>1.3</b>                |
| Al(III)         | <b>5.4</b>            | <b>0.9</b>                |
| Cs(I)           | <b>5.9</b>            | <b>0.8</b>                |
| Fe(III)         | <b>9.3</b>            | <b>0.7</b>                |
| PA              | <b>91.5</b>           | <b>1.5</b>                |

**Table S6.** Comparison table for fluorescent sensors of PA in the literature.

| Material                        | Linear Range ( $\mu\text{M}$ ) | LOD                          | Medium Used              | Interference from cations and anions                          | Effect of pH           | Selectivity   | Ref.      |
|---------------------------------|--------------------------------|------------------------------|--------------------------|---------------------------------------------------------------|------------------------|---------------|-----------|
| Metal organic framework         | -                              | -                            | Acetonitrile             | Not Checked                                                   | -                      | Yes           | S1        |
| Organic Cage                    | -                              | 0.06 $\mu\text{M}$ (6.4 ppb) | Dichloromethane (DCM)    | Not Checked                                                   | -                      | Yes           | S2        |
| Small molecules                 | 0-10                           | 0.5 $\mu\text{M}$            | Ethanol                  | Not Checked                                                   | -                      | Poor          | S3        |
| Small molecules                 | 2-16                           | 2 $\mu\text{M}$              | DMSO-Chloroform          | Not Checked                                                   | -                      | Poor          | S4        |
| Small molecules                 | 0-20                           | 0.35 $\mu\text{M}$           | Toulene-DCM              | Not Checked                                                   | -                      | Poor          | S5        |
| Metal organic framework         | 0-50                           | 2.5 $\mu\text{M}$            | Dimethyl acetamide (DMA) | Not Checked                                                   | -                      | Yes           | S6        |
| Covalent organic polymer        | -                              | 4.37 $\mu\text{M}$           | Methanol                 | Not Checked                                                   | -                      | Yes           | S7        |
| Small molecules                 | 0-1                            | .28 $\mu\text{M}$            | Water/ THF (7:3)         | No interference                                               | -                      | Yes           | S8        |
| Tetraphenyl ethelene Nanosphere | -                              | 0.005 $\mu\text{M}$          | Water/ THF (9:1)         | Not Checked                                                   |                        | Yes           | S9        |
| Iridium complex                 | -                              | -                            | Water/acetone (9:1)      | Slightly for Hg(II)                                           | No effect              | Yes           | S10       |
| Conjugated polyelectrolytes     | 0-51                           | 0.72 $\mu\text{M}$           | Water/ THF (9:1)         | Not Checked                                                   | -                      | Not studied   | S11       |
| Inorganic polymer               | -                              | (54 $\mu\text{g/mL}$ ) 1ppm  | Water/ THF (9:1)         | Not Checked                                                   | -                      | Not studied   | S12       |
| Hyperbranched polymer           | -                              | 1 $\mu\text{g/mL}$           | Water/ THF (9:1)         | Not Checked                                                   | -                      | Not studied   | S13       |
| Functional polymer              |                                | 1 $\mu\text{M}$              | Water/ THF (9:1)         | Not Checked                                                   | -                      | Non-selective | S14       |
| MoS <sub>2</sub> Quantum dots   | 0.99-36.5                      | 0.095                        | Water                    | Moderate interference from Fe(III), Ni(II), Hg(II), Co (II)   | -                      | Yes           | S15       |
| Conjugated polyelectrolytes     | 0-20                           | 128 ppt                      | Water                    | Not Checked                                                   | -                      | Yes           | S16       |
| Graphene oxide                  | -                              | 0.55 $\mu\text{M}$           | Water                    | Not Checked                                                   | -                      | Yes           | S17       |
| Small molecules                 | 0.01-0.07                      | 0.013 $\mu\text{M}$          | Water                    | No interference                                               | -                      | Yes           | S18       |
| Carbon dots                     | -                              | 0.10 $\mu\text{M}$           | Water                    | Moderate interference observed                                | pH dependent quenching | Yes           | S19       |
| Carbon dots                     | -                              | 1 $\mu\text{M}$              | Water                    | Not Checked                                                   | pH dependent quenching | Yes           | S20       |
| Non conjugated polymer NPs      | 0.05-70                        | 0.026 $\mu\text{M}$          | Water                    | Appreciable interference from Cu(II), Ni(II), Fe(III), Zn(II) | pH dependent quenching | Yes           | S21       |
| PS nanobeads                    | 0-30; 40-70                    | 0.058 $\mu\text{M}$          | Water                    | No interference at all                                        | No dependence          | Yes           | This work |

**Scheme S1.** Chemical structures of nitro-organic compounds.

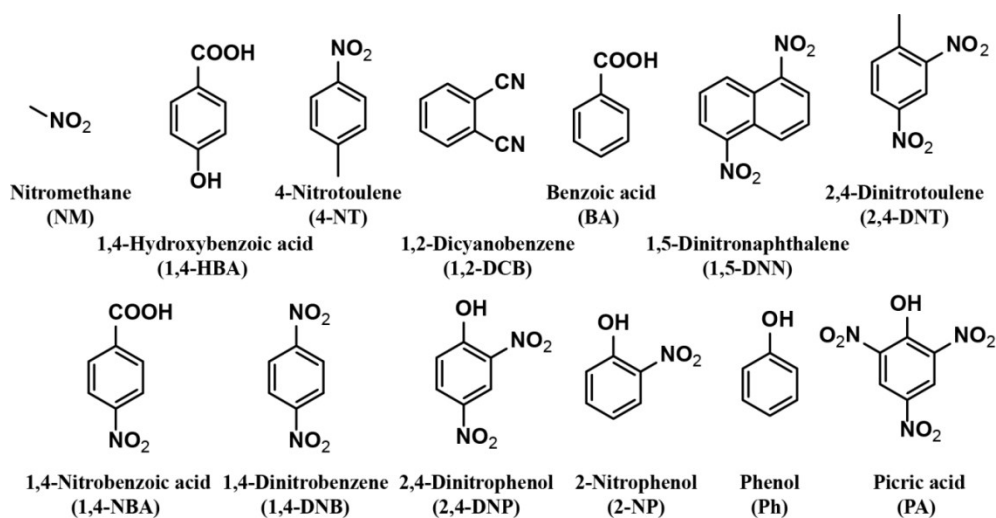

**Figure S1.** FTIR plot of polymer on KBr pellet.

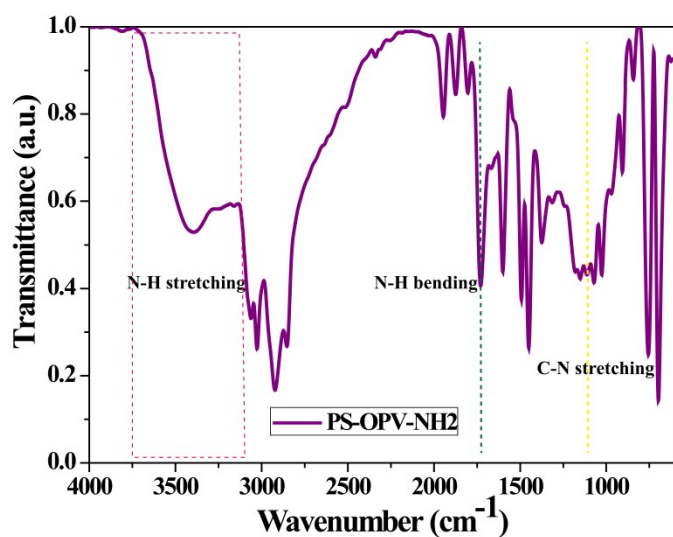

**Figure S2.** Normalized intensity-average size distribution of polymer in demineralized water using Dynamic Light Scattering.

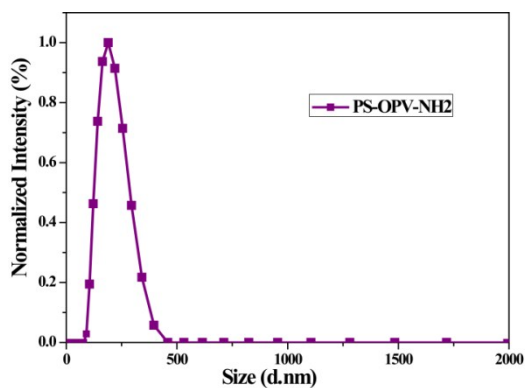



**Figure S3.** TEM image of PS-OPV-NH<sub>2</sub> polymer.

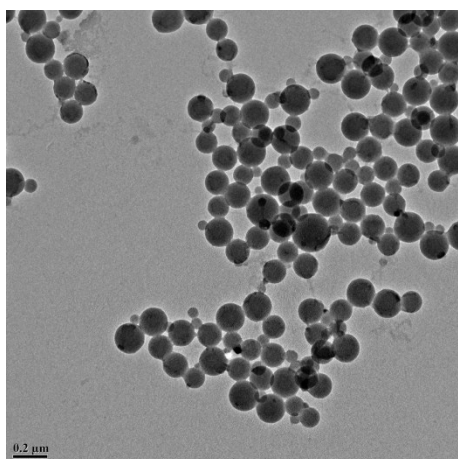

**Figure S4.** Absorption spectra of the polymer in THF (1mg/ml) for DLC and DLE calculation.

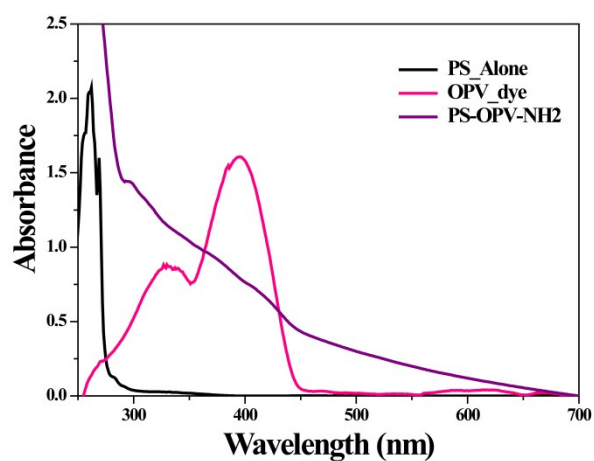

**Figure S5.** Solution state (a) emission (at 390 nm) and (b) excitation spectra (collected at 445 nm) of the polymer PS-OPV-NH<sub>2</sub> in demineralized water.

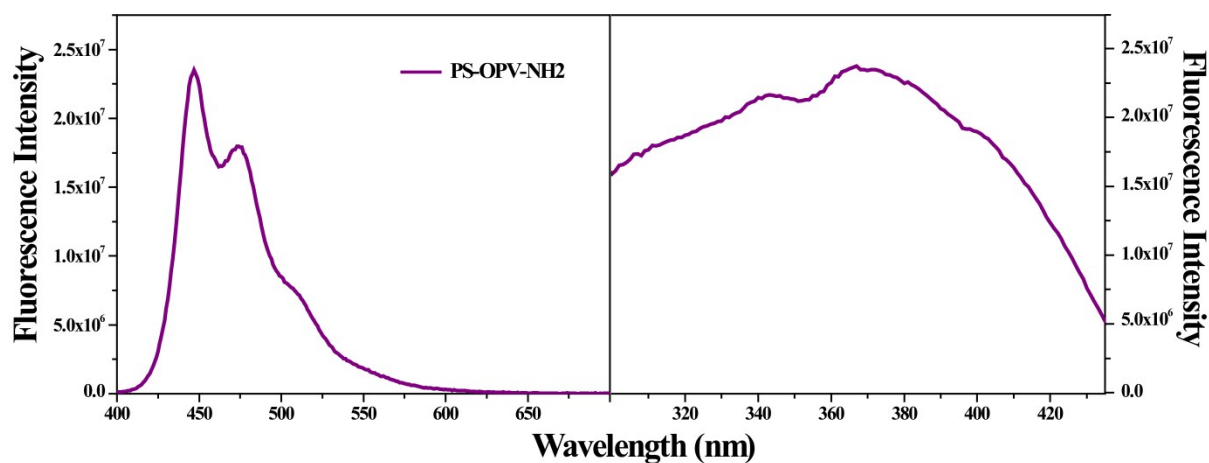

**Figure S6.** CIE co-ordinate diagram of PS-OPV-NH2.

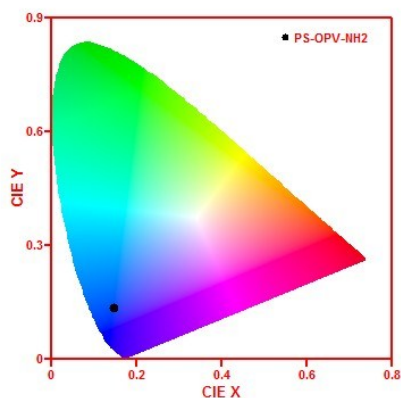

**Figure S7.** Emission spectra for PS-OPV-NH2 depicting non-quenching of OPV emission on varying pH from 1 to 14.

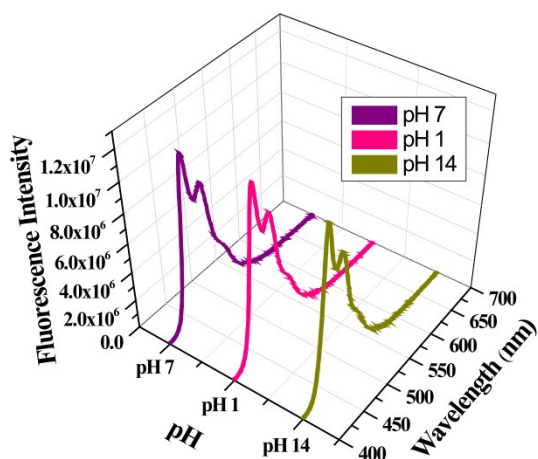

**Figure S8.** Emission spectra for PS-OPV-NH2 depicting non-quenching of OPV emission on varying temperature from 0°C to 60°C.

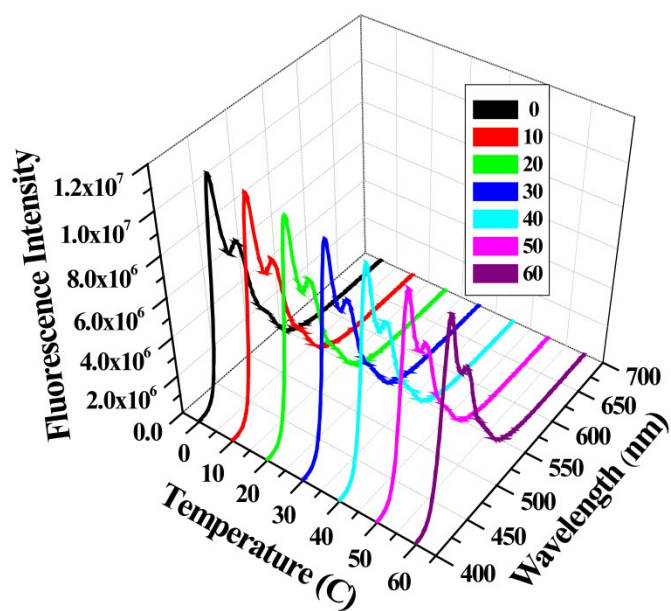

**Figure S9.** Plot of linear ranges using Stern-Volmer equation from 0 to 30 ( $R^2 = 0.982$ ) and 40 to 70  $\mu\text{M}$  ( $R^2 = 0.998$ ).

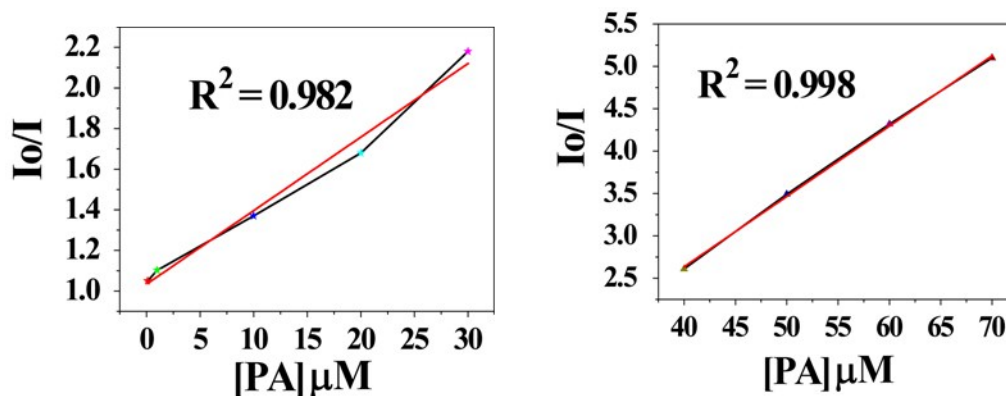

**Figure S10.** Plot of absorption spectra of PS-OPV-NH<sub>2</sub> on varying concentration of PA.

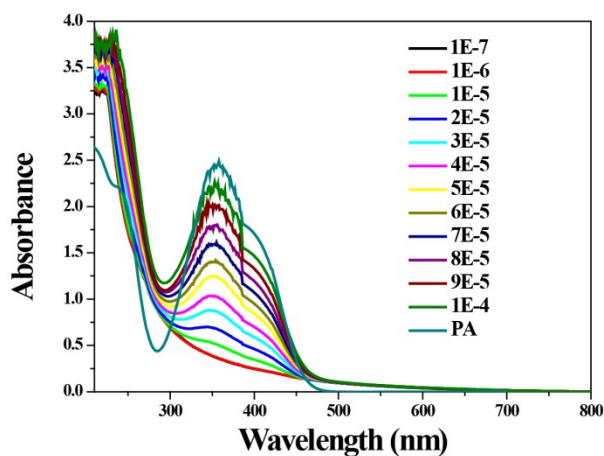

**Figure S11.** Mechanism of quenching depicting the overlap of absorption spectra of nitrophenols to that of OPV emission.

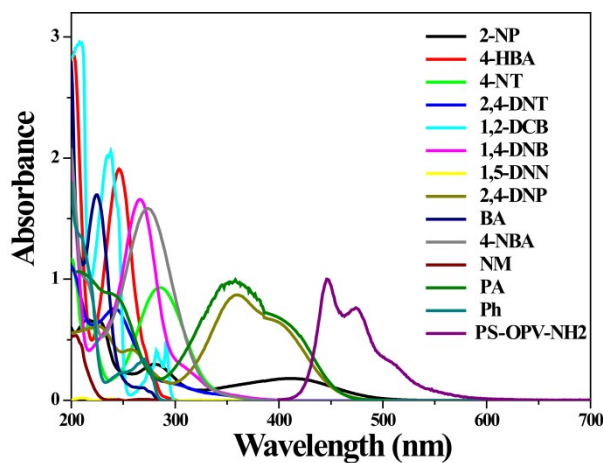

**Figure S12.** Emission spectra of PS-OPV-NH<sub>2</sub> after the addition of 1M NaCl.

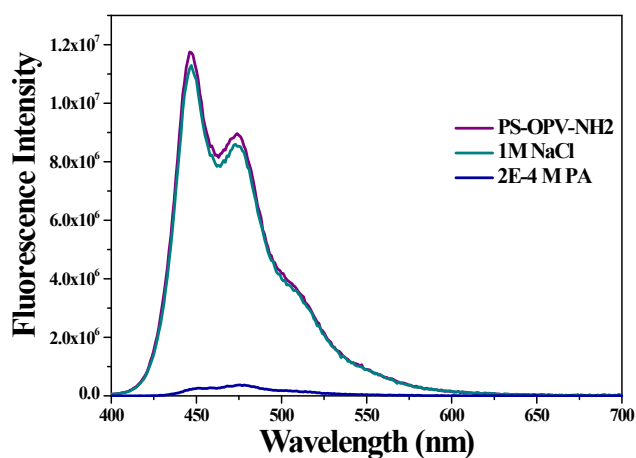

**Figure S13.** Quenching observed on dipping free standing film into PA in water.

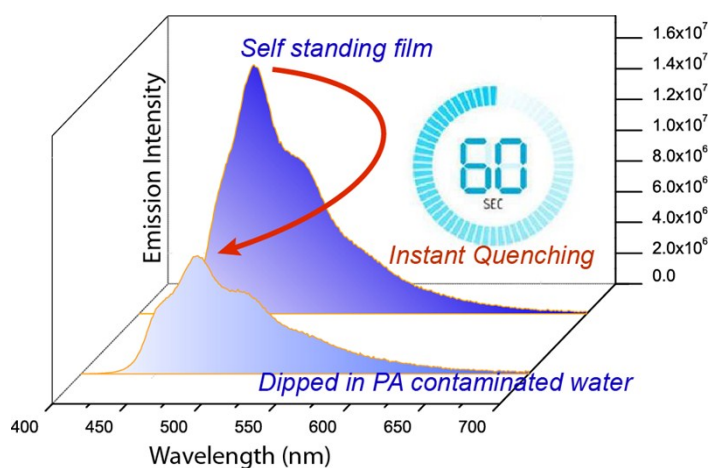

## References

- S1. S. S. Nagarkar, B. Joarder, A. K. Chaudhari, S. Mukherjee, S. K. Ghosh. *Angew. Chem. Int. Ed.*, 2013, **52**, 2881-2885.
- S2. K. Acharyya and P. S. Mukherjee. *Chem. Commun.*, 2014, **50**, 15788-15791.
- S3. N. Venkatramaiah, S. Kumar and S. Patil. *Chem. Commun.*, 2012, **48**, 5007-5009.
- S4. B. Roy, A. K. Bar, B. Gole and P. S. Mukherjee. *J. Org. Chem.*, 2013, **78**, 1306-1310.
- S5. V. Bhalla, A. Gupta, M. Kumar, D. S. S. Rao, S. K. Prasad. *ACS Appl. Mater. Interfaces*, 2013, **5**, 672-679.

- S6. Z. Q. Shi, Z. J. Guo and H. G. Zheng. *Chem. Commun.*, 2015, **51**, 8300-8303.
- S7. N. Sang, C. Zhan and D. Cao. *J. Mater. Chem. A*, 2015, **3**, 92-96.
- S8. A. Ding, L. Yang, Y. Zhang, G. Zhang, L. Kong, X. Zhang, Y. Tian, X. Tao and J. Yang. *Chem. Eur. J.*, 2014, **20**, 12215-12222.
- S9. H. T. Feng and Y. S. Zheng. *Chem. Eur. J.*, 2014, **20**, 195-201.
- S10. X. G. Hou, Y. Wu, H. T. Cao, H. Z. Sun, H. B. Li, G. G. Shan and Z. M. Su. *Chem. Commun.*, 2014, **50**, 6031-6034.
- S11. W. Z. Yuan, H. Zhao, X. Y. Shen, F. Mahtab, J. W. Y. Lam, J. Z. Sun and B. Z. Tang. *Macromolecules*, 2009, **42**, 9400-9411.
- S12. P. Lu, J. W. Y. Lam, J. Liu, C. K. W. Jim, W. Yuan, C. Y. K. Chan, N. Xie, Q. Hu, K. K. L. Cheuk and B. Z. Tang. *Macromolecules*, 2011, **44**, 5977-5986.
- S13. H. Li, H. Wu, E. Zhao, J. Li, J. Z. Sun, A. Qin, and B. Z. Tang. *Macromolecules*, 2013, **46**, 3907-3914.
- S14. Y. Liu, M. Gao, J. W. Y. Lam, R. Hu and B. Z. Tang. *Macromolecules*, 2014, **47**, 4908-4919.
- S15. Y. Wang and Y. Ni. *Anal. Chem.*, 2014, **86**, 7463-7470.
- S16. S. Hussain, A. H. Malik, M. A. Afroz and P. K. Iyer. *Chem. Commun.*, 2015, **51**, 7207-7210.
- S17. D. Dinda, A. Gupta, B. K. Shaw, S. Sadhu and S. K. Saha. *ACS Appl. Mater. Interfaces*, 2014, **6**, 10722-10728.
- S18. B. Gogoi and N. Sen Sarma. *ACS Appl. Mater. Interfaces*. 2015, **7**, 11195-11202.
- S19. H. K. Sadhanala and K. K. Nanda. *J. Phys. Chem. C*. 2015, **119**, 13138-13143.
- S20. Q. Niu, K. Gao, Z. Lin and W. Wu. *Anal. Methods*. 2013, **5**, 6228-6233.
- S21. S. G. Liu, D. Luo, N. Li, W. Zhang, J. L. Lei, N. B. Li and H. Q. Luo. *ACS Appl. Mater. Interfaces*, 2016, **8**, 21700-21709.
